# Supplementary material for: Microwave-Assisted Synthesis of Zn2SnO4 Nanostructures for Photodegradation of Rhodamine B under UV and Sunlight
Source: MDPI journal article supplement (doi:10.3390/nano12122119), 2022-06-20
Supplement: s1 [file s1]

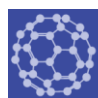

# Microwave-Assisted Synthesis of $\text{Zn}_2\text{SnO}_4$ Nanostructures for Photodegradation of Rhodamine B under UV and Sunlight

Ana Rovisco <sup>\*,†</sup>, Maria Morais <sup>†</sup>, Rita Branquinho, Elvira Fortunato, Rodrigo Martins and Pedro Barquinha <sup>\*</sup>

CENIMAT/i3N, Department of Materials Science, NOVA School of Science and Technology (FCT-NOVA) and CEMOP/UNINOVA, NOVA University Lisbon, Campus de Caparica, 2829-516 Caparica, Portugal; md.morais@campus.fct.unl.pt (M.M.); ritasba@fct.unl.pt (R.B.); emf@fct.unl.pt (E.F.); rfpm@fct.unl.pt (R.M.)

<sup>\*</sup> Correspondence: a.rovisco@fct.unl.pt (A.R.); pmcb@fct.unl.pt (P.B.)

<sup>†</sup> These authors contributed equally to this work.

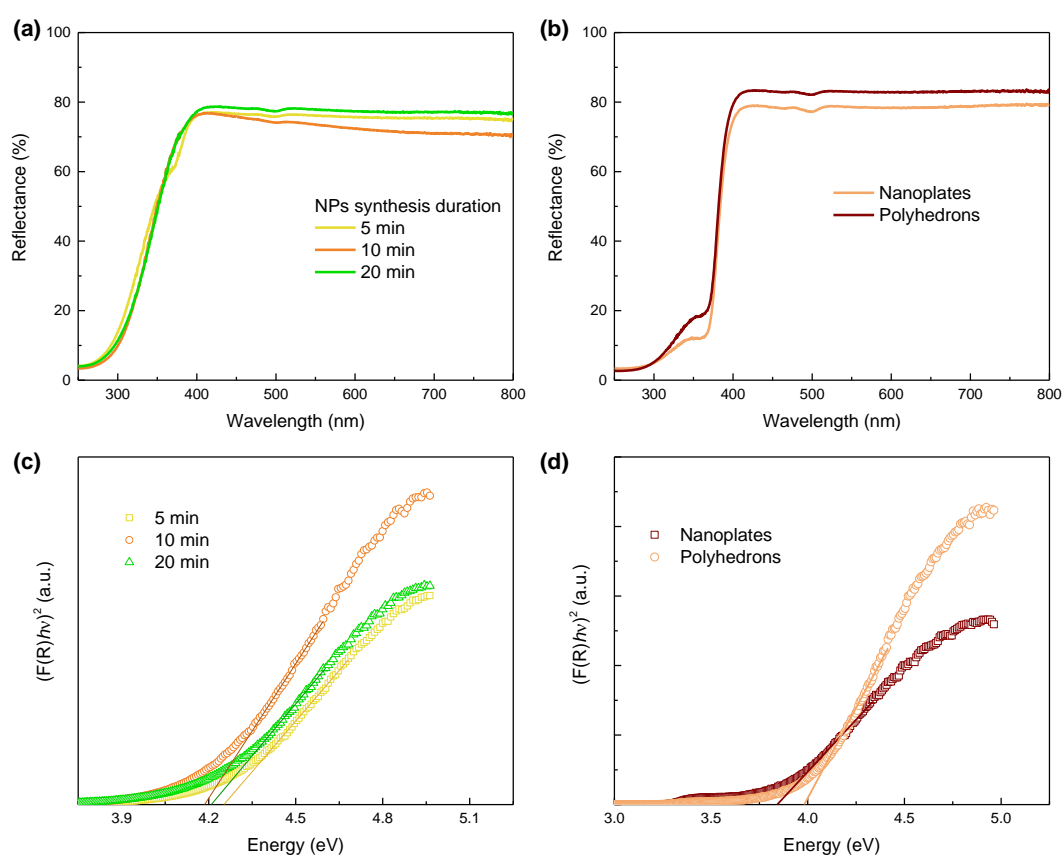

**Figure S1.** (a and b) Diffuse reflectance spectra and (c and d) Kubelka-Munk function of  $\text{Zn}_2\text{SnO}_4$  nanoparticles, and nanoplates and polyhedrons, respectively. The lines in (c) and (d) represent the linear fittings applied for the determination of the optical band gap values.

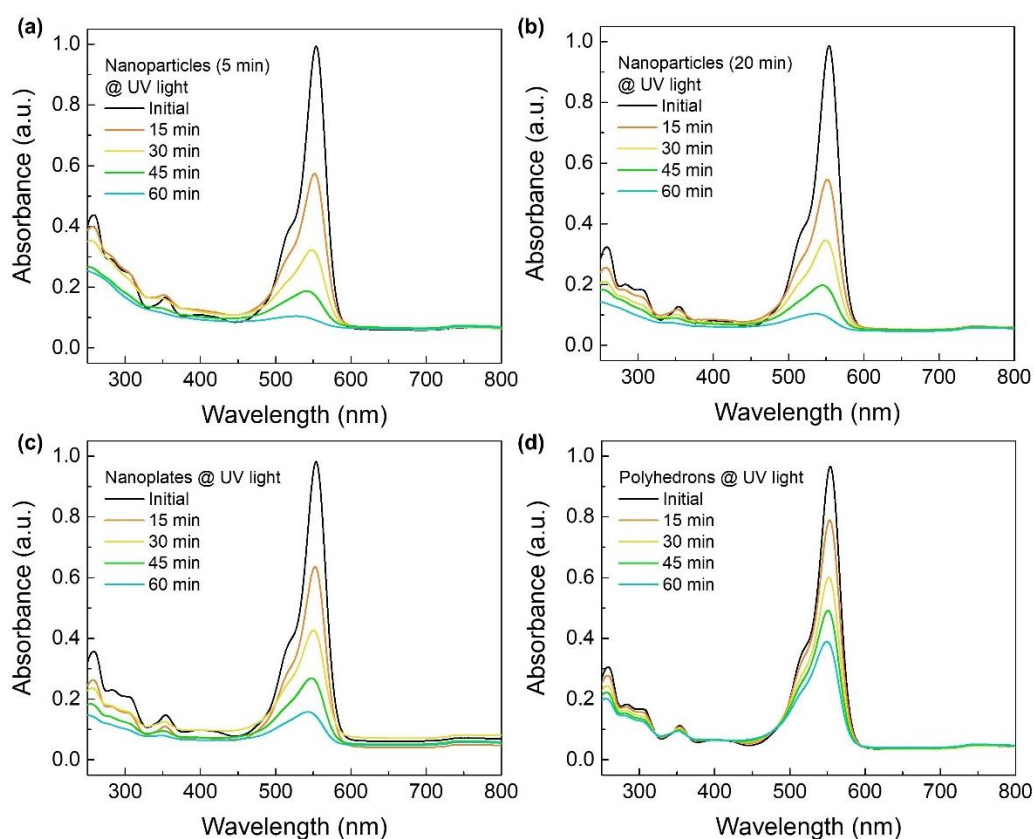

**Figure S2.** Absorbance spectra of the RhB degradation under UV light irradiation in the presence of  $\text{Zn}_2\text{SnO}_4$  (a) nanoparticles (5 min synthesis time), (b) nanoparticles (20 min synthesis time), (c) nanoplates, and (d) polyhedrons.

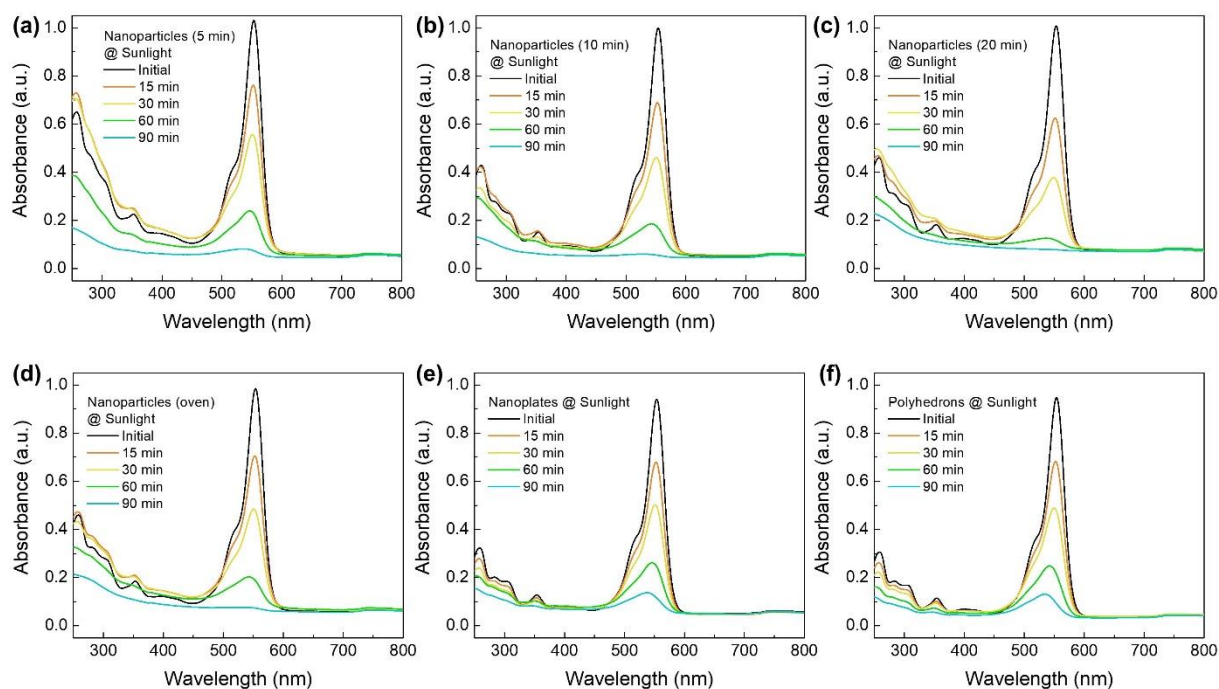

**Figure S3.** Absorbance spectra of the RhB degradation under natural sunlight irradiation in the presence of  $\text{Zn}_2\text{SnO}_4$  (a) nanoparticles (5 min synthesis time), (b) nanoparticles (10 min synthesis time), (c) nanoparticles (20 min synthesis time), (d) nanoparticles (conventional oven), (e) nanoplates, and (f) polyhedrons.
